# Supplementary material
Source: PubMed Central journal article supplement (PMC3265063)

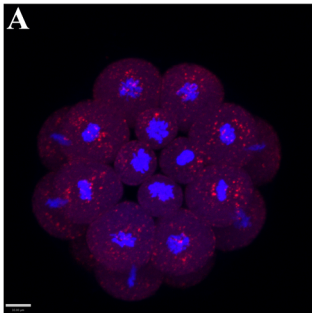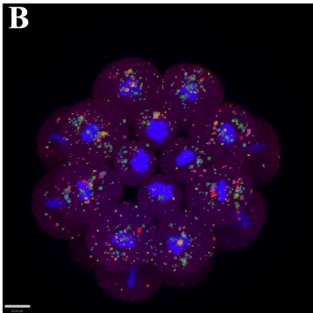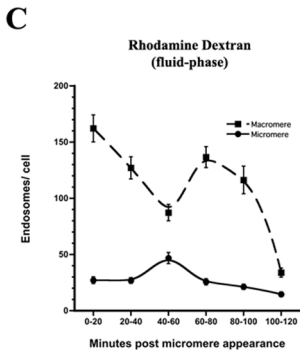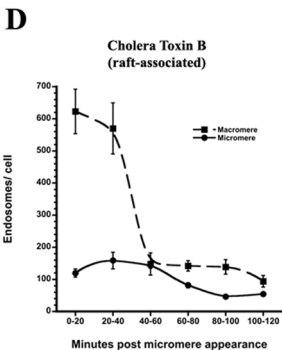

Supplement: supp_139.4.783_DEV076752FigS1.pdf [file supp_139.4.783_DEV076752FigS1.pdf]

**-FTC**

**+FTC**

**Fluorescence**

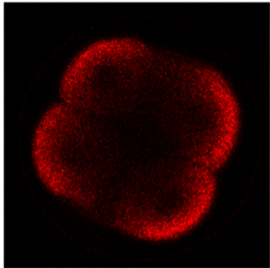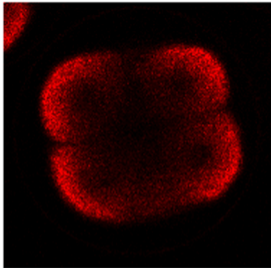

**DIC**

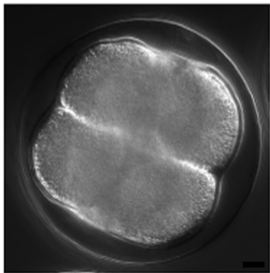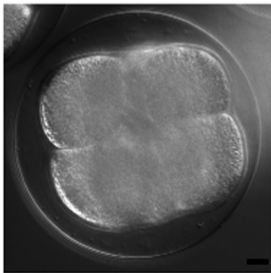

Supplement: supp_139.4.783_DEV076752FigS2.pdf [file supp_139.4.783_DEV076752FigS2.pdf]
